# Supplementary material for: Unveiling the luminescence property of Pr-incorporated barium cerate perovskites for white LED applications
Source: publisher site journal article supplement (doi:10.1515/zna-2023-0304), 2024-01-29
Supplement: Supplementary file 1 [file j_zna-2023-0304_suppl_001.docx]

**Thermogravimetric analysis**

To understand the materials' thermal stability, thermogravimetry analysis was carried out. TGA plot of the optimized sample taken in nitrogen environment is shown below.





First weight loss below 150ºC may be due to the evaporation of moisture adsorbed from the atmosphere before performing the test. The succeeding small loss at around 350ºC may be due to the elimination of structural water and then saturation is observed in the TGA curves. Thus, the total weight loss is the removal of water, as confirmed in similar studies. This proves the thermal stability of prepared material.
